# Supplementary material for: Sex differences in risk of incident microvascular and macrovascular complications: a population-based data-linkage study among 25 713 people with diabetes
Source: HighWire-hosted journal article supplement (doi:10.1136/jech-2023-221759), 2024-05-16
Supplement: jech-2023-221759supp001_data_supplement.pdf [file jech-2023-221759supp001_data_supplement.pdf]

## SUPPLEMENTARY MATERIAL

### **Sex differences in risk of incident micro and macrovascular complications: a population-based data-linkage study among 25, 713 people with diabetes.**

#### **Detailed information about linked administrative datasets and data linkage procedures.**

For this study we used data from participants' baseline questionnaires that were linked to their corresponding medical services claims (medicare benefits schedule, MBS), prescription medication (pharmaceutical benefits schedule, PBS), hospital admission (admitted patient data collection, APDC) and death registry data collections (registry of Births Deaths and Marriages, RBDM). The MBS and PBS data were supplied by Services Australia, an agency of the Australian government responsible for the delivery of government payments and services. Medicare is a universal healthcare system that provides Government subsidies for out-of-hospital health care services, tests, and interventions. The MBS is a listing of the Medicare health care services subsidised by the Australian federal government. The PBS claims data lists all the medicines dispensed to patients subsidised by the Australian government. Linkage of the 45 and Up cohort data to the MBS and PBS data is facilitated by the Sax Institute using a unique identifier provided by Services Australia. The NSW APDC included records of all admitted patient services provided by NSW Public and Private Hospitals. The APDC and the RBDM death registrations were also linked, and this was conducted by the NSW Centre for Health Record Linkage (CHeReL). CHeReL uses a probabilistic procedure to link records, in which records with an uncertain probability of being true matches are checked by hand. Its current estimated false positive rate is 0.5% (<http://www.cherel.org.au/>). The Sax Institute's Secure Unified Research Environment (SURE) provided secure data storage and access.

## Identification of diabetes cases by data source

### *Self-report*

The question in the baseline, SEEF and follow-up questionnaires used to ascertain self-reported diabetes cases was: “has a doctor EVER told you that you have diabetes”.

### *Medicare Benefit Schedule*

Potential diabetes cases were identified by claims for MBS items that can only be claimed by people who have been diagnosed with diabetes. These included pathology items for HbA1c (66551) and fructosamine (66557); items for completion of an Annual Cycle of Care (ACOC) (2517, 2518 2517, 2518, 2521, 2522, 2525, 2526, 2620, 2622, 2624, 2631, 2633, 2635); an item for a diabetes eye examination with an optometrist (10951) and consultations with allied health professionals, including diabetes educators, dietitians and exercise physiologists (81305, 81120, 81125, 81100, 81105, 81110, 81115). Of note, we only included individual or group allied health consultations specific for people with type 2 diabetes or those with a diabetes educator as the other allied health item numbers can be claimed by people with chronic diseases other than diabetes who are managed by a general practitioner chronic disease management plan.

### *Pharmaceutical Benefit Scheme*

Dispensation of medications used for the management of diabetes, including ‘Insulin and other analogues (A10A)’ and ‘Glucose lowering medications (A10B)’ were used to identify potential diabetes cases.

### *NSW Admitted Patient Data Collection*

Hospital admissions which corresponded to International Classification of Disease (ICD-10-AM) diagnostic codes for ‘type 1’, ‘type 2’, ‘other’ or ‘unspecified’ diabetes (E10, E11, E13, E14, respectively) were used to identify potential diabetes cases.

*‘Uncertain diabetes’ cases*

If a person was identified as taking metformin only they also had to be identified in at least one other data source (i.e. self-report, MBS or APDC data) to be classified as a diabetes case. If they were not identified in another data source, they were classified as an uncertain diabetes case. Of those not identified in the PBS dataset as taking insulin or any oral glucose lowering medication, to be classified as a diabetes case they had to be identified at least twice across or within the MBS or APDC data sources, or via self-report in either the SEEF or follow-up surveys. Those who were only identified once across these data sources were classified as an ‘uncertain diabetes’ case. Uncertain diabetes cases were excluded from the study.

Identification of diabetes complications

Diabetes-related complications were primarily ascertained from hospital admission records (APDC) using principal and additional ICD-10-AM diagnosis or Australian Classification of Healthcare Interventions (ACHI) procedure codes. As not all diabetes-related complications included in this analysis require hospital admission, we also included out-of-hospital treatment for complications such as home dialysis for chronic kidney disease, or retinal laser. This was identified using relevant MBS treatment items.

Supplementary Table 1: Description, data sources, code type and code lists used to identify treatment and hospitalisation for diabetes-related complications

| Diabetes-related complication category                 | Data source | Code type    | Code list                          |                                                                     |
|--------------------------------------------------------|-------------|--------------|------------------------------------|---------------------------------------------------------------------|
| Hospitalisation for cardiovascular disease             |             |              | Any codes listed in this box below |                                                                     |
| Diabetic cardiomyopathy                                | APDC        | ICD-10-AM Dx | E10.53                             | Type 1 diabetes mellitus with diabetic cardiomyopathy               |
|                                                        |             |              | E11.53                             | Type 2 diabetes mellitus with diabetic cardiomyopathy               |
|                                                        |             |              | E13.53                             | Other specified diabetes mellitus with diabetic cardiomyopathy      |
|                                                        |             |              | E14.53                             | Unspecified diabetes mellitus with diabetic cardiomyopathy          |
| Ischaemic heart disease: Myocardial infarct            | APDC        | ICD-10-AM Dx | I21                                | Acute myocardial infarction                                         |
|                                                        |             |              | I22                                | Subsequent myocardial infarction                                    |
| Ischaemic heart disease: Other coronary heart diseases | APDC        | ICD-10-AM Dx | I20                                | Angina pectoris                                                     |
|                                                        |             |              | I23                                | Certain current complications following acute myocardial infarction |

|                                                   |      |                 |                                    |                                                                |
|---------------------------------------------------|------|-----------------|------------------------------------|----------------------------------------------------------------|
|                                                   |      |                 | I24                                | Other acute ischaemic heart diseases                           |
|                                                   |      |                 | I25                                | Chronic ischaemic heart disease                                |
| Transient ischemic attack (TIA)                   | APDC | ICD-10-AM Dx    | G45                                | Transient cerebral ischaemic attacks and related syndromes     |
| Stroke                                            | APDC | ICD-10-AM Dx    | I60                                | Subarachnoid haemorrhage                                       |
|                                                   |      |                 | I61                                | Intracerebral haemorrhage                                      |
|                                                   |      |                 | I63                                | Cerebral infarction                                            |
|                                                   |      |                 | I64                                | Stroke, not specified as haemorrhage or infarction             |
| Heart failure                                     | APDC | ICD-10-AM Dx    | I50                                | Heart failure                                                  |
| Hospitalisation or treatment for eye complication |      |                 | Any codes listed in this box below |                                                                |
| Diabetes with any ophthalmic complication         | APDC | ICD-10-AM Dx    | E10.3                              | Type 1 diabetes mellitus with ophthalmic complication          |
|                                                   |      |                 | E11.3                              | Type 2 diabetes mellitus with ophthalmic complication          |
|                                                   |      |                 | E13.3                              | Other specified diabetes mellitus with ophthalmic complication |
|                                                   |      |                 | E14.3                              | Unspecified diabetes mellitus with ophthalmic complication     |
| Cataract                                          | APDC | ICD-10-AM Dx    | E10.36                             | Type 1 diabetes mellitus with diabetic cataract                |
|                                                   |      |                 | E11.36                             | Type 2 diabetes mellitus with diabetic cataract                |
|                                                   |      |                 | E13.36                             | Other specified diabetes mellitus with diabetic cataract       |
|                                                   |      |                 | E14.36                             | Unspecified diabetes mellitus with diabetic cataract           |
|                                                   | MBS  | MBS item number | 42698                              | Lens extraction                                                |
|                                                   |      |                 | 42701                              | Intraocular lens, insertion of                                 |
|                                                   |      |                 | 42702                              | Lens extraction and insertion of intraocular lens              |

|                      |      |                |        |                                                                                                                                 |
|----------------------|------|----------------|--------|---------------------------------------------------------------------------------------------------------------------------------|
|                      |      |                | 42703  | Intraocular lens or iris prosthesis, insertion of, into the posterior chamber with fixation to the iris or sclera               |
|                      |      |                | 42704  | Intraocular lens, removal or repositioning of by open operation                                                                 |
|                      |      |                | 42705  | Lens extraction and insertion of intraocular lens                                                                               |
|                      |      |                | 42707  | Intraocular lens removal of and replacement with a different lens                                                               |
|                      |      |                | 42710  | Intraocular lens, removal of, and replacement with a lens inserted into the posterior chamber and fixated to the iris or sclera |
|                      |      |                | 42713  | Iris suturing, McCannell technique or similar, for fixation of intraocular lens or repair of iris defect                        |
|                      |      |                | 42716  | Cataract, juvenile, removal of, including subsequent needlings                                                                  |
|                      | APDC | ACHI procedure | 193    | Insertion of intraocular lens prosthesis                                                                                        |
|                      |      |                | 194    | Replacement or removal of intraocular lens                                                                                      |
|                      |      |                | 200    | Extraction of crystalline lens                                                                                                  |
|                      |      |                |        |                                                                                                                                 |
| Diabetic retinopathy | APDC | ICD-10-AM Dx   | E10.31 | Type 1 diabetes mellitus with background retinopathy                                                                            |
|                      |      |                | E10.32 | Type 1 diabetes mellitus with preproliferative retinopathy                                                                      |
|                      |      |                | E10.33 | Type 1 diabetes mellitus with proliferative retinopathy                                                                         |
|                      |      |                | E10.34 | Type 1 diabetes mellitus with other retinopathy                                                                                 |
|                      |      |                | E11.31 | Type 2 diabetes mellitus with background retinopathy                                                                            |
|                      |      |                | E11.32 | Type 2 diabetes mellitus with preproliferative retinopathy                                                                      |
|                      |      |                | E11.33 | Type 2 diabetes mellitus with proliferative retinopathy                                                                         |
|                      |      |                | E11.34 | Type 2 diabetes mellitus with other retinopathy                                                                                 |

|                      |      |                 |        |                                                                     |
|----------------------|------|-----------------|--------|---------------------------------------------------------------------|
|                      |      |                 | E13.31 | Other specified diabetes mellitus with background retinopathy       |
|                      |      |                 | E13.32 | Other specified diabetes mellitus with preproliferative retinopathy |
|                      |      |                 | E13.33 | Other specified diabetes mellitus with proliferative retinopathy    |
|                      |      |                 | E13.34 | Other specified diabetes mellitus with other retinopathy            |
|                      |      |                 | E13.41 | Unspecified diabetes mellitus with background retinopathy           |
|                      |      |                 | E13.42 | Unspecified diabetes mellitus with preproliferative retinopathy     |
|                      |      |                 | E13.43 | Unspecified diabetes mellitus with proliferative retinopathy        |
|                      |      |                 | E13.44 | Unspecified diabetes mellitus with other retinopathy                |
| Vitreous haemorrhage | MBS  | MBS item number | 42725  | Vitrectomy via pars plana sclerotomy                                |
|                      | APDC | ACHI procedure  | 206    | Destruction procedures on aqueous or vitreous                       |
|                      |      |                 | 207    | Vitrectomy                                                          |
| Retinal lesion       | MBS  | MBS item number | 42809  | Retina, photocoagulation of                                         |
|                      |      |                 | 42738  | Paracentesis of anterior chamber or vitreous cavity, or both        |
|                      |      |                 | 42739  | Paracentesis of anterior chamber or vitreous cavity or both         |
|                      |      |                 | 42740  | Paracentesis of anterior chamber or vitreous cavity or both         |
|                      | APDC | ACHI procedure  | 211    | Destruction procedures on retina, choroid or posterior chamber      |
| Retinal detachment   | MBS  | MBS item number | 42773  | Detached retina, pneumatic retinopexy for                           |
|                      |      |                 | 42776  | Detached retina, buckling or resection operation for                |
|                      |      |                 | 42779  | Detached retina, revision of scleral buckling operation for         |
|                      | APDC | ACHI procedure  | 212    | Repair of retinal detachment                                        |

|                                                          |      |                                    |                                                                                 |
|----------------------------------------------------------|------|------------------------------------|---------------------------------------------------------------------------------|
|                                                          |      | 213                                | Revision procedures on retina, choroid or posterior chamber                     |
| Hospitalisation or treatment for lower limb complication |      | Any codes listed in this box below |                                                                                 |
| Peripheral neuropathy                                    | APDC | ICD-10-AM Dx                       | E10.42 Type 1 diabetes mellitus with polyneuropathy                             |
|                                                          |      |                                    | E11.42 Type 2 diabetes mellitus with polyneuropathy                             |
|                                                          |      |                                    | E13.42 Other specified diabetes mellitus with polyneuropathy                    |
|                                                          |      |                                    | E14.42 Unspecified diabetes mellitus with polyneuropathy                        |
| Ulcer                                                    | APDC | ICD-10-AM Dx                       | E10.73 Type 1 diabetes mellitus with foot ulcer due to multiple causes          |
|                                                          |      |                                    | E11.73 Type 2 diabetes mellitus with foot ulcer due to multiple causes          |
|                                                          |      |                                    | E13.73 Other specified diabetes mellitus with foot ulcer due to multiple causes |
|                                                          |      |                                    | E14.73 Unspecified diabetes mellitus with foot ulcer due to multiple causes     |
|                                                          |      |                                    | L97 Ulcer of lower limb, not elsewhere classified                               |
| Cellulitis (toe, foot or lower limb)                     | APDC | ICD-10-AM Dx                       | L03.02 Cellulitis of toe                                                        |
|                                                          |      |                                    | L03.11 Cellulitis of lower limb                                                 |
|                                                          |      |                                    | L03.13 Cellulitis of lower limb                                                 |
|                                                          |      |                                    | L03.14 Cellulitis of foot                                                       |
| Charcot toe                                              | APDC | ICD-10-AM Dx                       | M14.6 Neuropathic arthropathy                                                   |
| Osteomyelitis                                            | APDC | ICD-10-AM Dx                       | M86.17 Other acute osteomyelitis, ankle and foot                                |
|                                                          |      |                                    | M86.27 Subacute osteomyelitis, ankle and foot                                   |
|                                                          |      |                                    | M86.47 Chronic osteomyelitis with draining sinus, ankle and foot                |
|                                                          |      |                                    | M86.67 Other chronic osteomyelitis, ankle and foot                              |



|                                                      |      |                |                                    |                                                                                |
|------------------------------------------------------|------|----------------|------------------------------------|--------------------------------------------------------------------------------|
|                                                      |      |                | M86.97                             | Unspecified osteomyelitis, ankle and foot                                      |
| Peripheral vascular disease                          | APDC | ICD-10-AM Dx   | E10.51                             | Type 1 diabetes mellitus with peripheral angiopathy, without gangrene          |
|                                                      |      |                | E10.52                             | Type 1 diabetes mellitus with peripheral angiopathy, with gangrene             |
|                                                      |      |                | E11.51                             | Type 2 diabetes mellitus with peripheral angiopathy, without gangrene          |
|                                                      |      |                | E11.52                             | Type 2 diabetes mellitus with peripheral angiopathy, with gangrene             |
|                                                      |      |                | E13.51                             | Other specified diabetes mellitus with peripheral angiopathy, without gangrene |
|                                                      |      |                | E13.52                             | Other specified diabetes mellitus with peripheral angiopathy,with gangrene     |
|                                                      |      |                | E14.51                             | Unspecified diabetes mellitus with peripheral angiopathy, without gangrene     |
|                                                      |      |                | E14.52                             | Unspecified diabetes mellitus with peripheral angiopathy, with gangrene        |
|                                                      |      |                | I70.2                              | Atherosclerosis of arteries of extremities                                     |
|                                                      |      |                | I73.8                              | Other specified peripheral vascular disease                                    |
|                                                      |      |                | I73.9                              | Peripheral vascular disease, unspecified                                       |
| Amputation:                                          |      |                |                                    |                                                                                |
| Minor (foot/ankle)                                   | APDC | ACHI procedure | 1533                               | Amputation of ankle or foot                                                    |
| Major (at, below or above knee)                      | APDC | ACHI procedure | 1505                               | Other excision procedures on knee or leg                                       |
|                                                      |      |                | 1484                               | Amputation of pelvis or hip                                                    |
| Hospitalisation or treatment for kidney complication |      |                | Any codes listed in this box below |                                                                                |
| Diabetes with kidney complication                    | APDC | ICD-10-AM Dx   | E10.2                              | Type 1 diabetes mellitus with kidney complication                              |
|                                                      |      |                | E11.2                              | Type 2 diabetes mellitus with kidney complication                              |

|                            |      |                 |          |                                                                                                |
|----------------------------|------|-----------------|----------|------------------------------------------------------------------------------------------------|
|                            |      |                 | E13.2    | Other specified diabetes mellitus with kidney complication                                     |
|                            |      |                 | E14.2    | Unspecified diabetes mellitus with kidney complication                                         |
| Acute kidney failure       | APDC | ICD-10-AM Dx    | N17      | Acute kidney failure                                                                           |
| Chronic kidney disease     | APDC | ICD-10-AM Dx    | N18      | Chronic kidney disease                                                                         |
| Unspecified kidney failure | APDC | ICD-10-AM Dx    | N19      | Unspecified kidney failure                                                                     |
| Dialysis                   |      |                 |          |                                                                                                |
| Home                       | MBS  | MBS item number | 13104    | Planning and management of home dialysis (either haemodialysis or peritoneal dialysis)         |
| Hospital                   | APDC | ICD-10-AM Dx    | Z49      | Care involving dialysis                                                                        |
|                            | APDC | ACHI procedure  | 13100-00 | Haemodialysis                                                                                  |
|                            |      |                 | 13100-06 | Peritoneal dialysis, short term                                                                |
|                            |      |                 | 13100-07 | Intermittent peritoneal dialysis, long term                                                    |
|                            |      |                 | 13100-08 | Continuous peritoneal dialysis, long term                                                      |
|                            |      |                 | 13104-00 | Education and training for home dialysis                                                       |
|                            |      |                 | 13109-01 | Replacement of indwelling peritoneal catheter for peritoneal dialysis                          |
|                            |      |                 | 13110-00 | Removal of indwelling peritoneal catheter for dialysis                                         |
|                            |      |                 | 13112-00 | Establishment of peritoneal dialysis by abdominal puncture and insertion of temporary catheter |
|                            |      |                 | 90351-00 | Removal of temporary catheter for peritoneal dialysis                                          |
|                            |      |                 | 90352-00 | Education and training for home dialysis                                                       |

|                   |      |                |                                       |                               |
|-------------------|------|----------------|---------------------------------------|-------------------------------|
|                   |      | 90353-00       | Test for haemodialysis adequacy       |                               |
|                   |      | 90353-01       | Test for peritoneal dialysis adequacy |                               |
| Kidney transplant | APDC | ACHI procedure | 36503-00                              | Kidney transplantation        |
|                   |      |                | 36503-01                              | Autotransplantation of kidney |

**Supplementary Table 2.** Questions and response options used in the 45 and Up Study to assess sociodemographic, lifestyle and health factors

| Factor                                     | Question                                                                                                                          | Response options                                                                                                                                                                                                                                                                                   | Response categories                                                                                                  |
|--------------------------------------------|-----------------------------------------------------------------------------------------------------------------------------------|----------------------------------------------------------------------------------------------------------------------------------------------------------------------------------------------------------------------------------------------------------------------------------------------------|----------------------------------------------------------------------------------------------------------------------|
| Age                                        | What is your date of birth?                                                                                                       | Day/month/year                                                                                                                                                                                                                                                                                     | 1. 45-59<br>2. 60-74<br>3. 75+ years                                                                                 |
| Household income per year                  | What is your usual yearly HOUSEHOLD income before tax, from all sources? (please include benefits, pensions, superannuation, etc) | Less than \$5,000 per year<br>\$5,000 - \$9,999 per year<br>\$10,000 - \$19,999 per year<br>\$20,000 - \$29,999 per year<br>\$30,000 - \$39,999 per year<br>\$40,000 - \$49,999 per year<br>\$50,000 - \$69,999 per year<br>\$70,000 or more per year<br>I would rather not answer this question   | 1. <\$30,000<br>2. \$30,000 to <\$70,0000<br>3. \$70,000+ Australian Dollars AUD per year                            |
| Highest education                          | What is the highest qualification you have completed?                                                                             | No school certificate or other qualifications<br>School or intermediate certificate (or equivalent)<br>Higher school or leaving certificate (or equivalent)<br>Trade/apprenticeship (e.g., hairdresser, chef)<br>Certificate/diploma (e.g., child care, technician)<br>University degree or higher | 1. up to school or intermediate certificate<br>2. higher school to diploma<br>3. university degree or higher         |
| Language other than English spoken at home | Do you speak a language other than English at home?                                                                               | Yes<br>No                                                                                                                                                                                                                                                                                          | 1. Yes<br>2. No                                                                                                      |
| Country of birth                           | In which country were you born?                                                                                                   | Australia<br>UK<br>Greece<br>Philippines<br>Poland<br>Ireland<br>New Zealand<br>Netherlands<br>Italy<br>Germany                                                                                                                                                                                    | 1. Asia (including the Indian sub-continent), Middle East, North Africa, Southern Europe<br>2. Australia<br>3. Other |

|                                       |                                                                                                                                                                                                                                                                                                                                                                                                                                                                           |                                                                                                                                                                                           |                                                                                                                                                    |
|---------------------------------------|---------------------------------------------------------------------------------------------------------------------------------------------------------------------------------------------------------------------------------------------------------------------------------------------------------------------------------------------------------------------------------------------------------------------------------------------------------------------------|-------------------------------------------------------------------------------------------------------------------------------------------------------------------------------------------|----------------------------------------------------------------------------------------------------------------------------------------------------|
|                                       |                                                                                                                                                                                                                                                                                                                                                                                                                                                                           | Vietnam<br>China<br>Lebanon<br>Malta<br>Other (please specify)                                                                                                                            |                                                                                                                                                    |
| Private health insurance              | Which of the following do you have? (excluding Medicare)                                                                                                                                                                                                                                                                                                                                                                                                                  | Private health insurance – with extras<br>Private health insurance – without extras<br>Department of Veterans' Affairs white or gold card<br>Health care concession card<br>None of these | 1. Yes<br>2. No                                                                                                                                    |
| Body weight (BMI, kg/m <sup>2</sup> ) | How tall are you without shoes? (please give to the nearest cm or inch)                                                                                                                                                                                                                                                                                                                                                                                                   | ___ cm OR ___ ft ___ inches                                                                                                                                                               | 1. underweight <18.5<br>2. normal 18.5 - < 25.0<br>3. overweight 25.0 - < 30.0<br>4. obese ≥30 kg/m <sup>2</sup>                                   |
|                                       | About how much do you weigh?                                                                                                                                                                                                                                                                                                                                                                                                                                              | ___ kg OR ___ stone ___ lbs                                                                                                                                                               |                                                                                                                                                    |
| Smoking status                        | Are you a regular smoker now?                                                                                                                                                                                                                                                                                                                                                                                                                                             | Yes/No                                                                                                                                                                                    | 1. current smoker<br>2. past smoker<br>3. never smoked                                                                                             |
|                                       | Have you ever been a regular smoker?                                                                                                                                                                                                                                                                                                                                                                                                                                      | Yes/No                                                                                                                                                                                    |                                                                                                                                                    |
| Physical activity                     | How many TIMES did you do each of these activities LAST WEEK?<br><br>-Walking continuously, for at least 10 minutes (for recreation or exercise or to get to or from places)<br>-Vigorous physical activity (that made you breathe harder or puff and pant, like jogging, cycling, aerobics, competitive tennis, but not household chores or gardening)<br>-Moderate physical activity (like gentle swimming, social tennis, vigorous gardening or work around the house) | ___ times in the last week (for walking, vigorous physical activity and moderate physical activity)                                                                                       | assessed in minutes of moderate to vigorous physical activity (MVPA) using the Active Australia questionnaire [12],<br>1. 0 – 149<br>2. ≥ 150 mins |
|                                       | If you add up all the time you spent doing each activity LAST WEEK, how much time did you spend ALTOGETHER doing each type of activity?                                                                                                                                                                                                                                                                                                                                   | ___ hours: __ minutes (for walking, vigorous physical activity and moderate physical activity)                                                                                            |                                                                                                                                                    |
| Meets fruit and veg requirements      | About how many serves of fruit do you usually have each day? A serve is 1 medium piece or 2 small pieces or 1 cup diced or canned fruit pieces                                                                                                                                                                                                                                                                                                                            | ___ number of serves of fruit each day                                                                                                                                                    | meets fruit and vegetable requirements,<br><br>yes: ≥2 serves of fruit, ≥5 serves of vegetables per day                                            |

|                                                         |                                                                                                                                                                                              |                                                                                                                                                         |                 |
|---------------------------------------------------------|----------------------------------------------------------------------------------------------------------------------------------------------------------------------------------------------|---------------------------------------------------------------------------------------------------------------------------------------------------------|-----------------|
|                                                         | About how many serves of vegetables do you usually eat each day? A serve is half a cup of cooked vegetables or one cup of salad (please include potatoes and put “0” is less than one a day) | __ number of serves of cooked vegetables each day<br>__ number of serves of raw vegetables each day (e.g. salad)                                        |                 |
| Family history of diabetes                              | Have your mother, father, brother(s) or sister(s) ever had diabetes                                                                                                                          | Mother<br>Father<br>Brother/sister                                                                                                                      | 1. Yes<br>2. No |
| Ever told by a doctor that you have heart disease       | Has a doctor EVER told you that you have heart disease                                                                                                                                       | Yes<br>__ Age when condition was first found<br>Type of heart disease (please describe)                                                                 | 1. Yes<br>2. No |
| Ever told by a doctor that you have had a stroke        | Has a doctor EVER told you that you have stroke                                                                                                                                              | Yes<br>__ Age when condition was first found                                                                                                            | 1. Yes<br>2. No |
| Ever told by a doctor that you have high blood pressure | Has a doctor EVER told you that you have high blood pressure – when pregnant                                                                                                                 | Yes<br>__ Age when condition was first found                                                                                                            | 1. Yes<br>2. No |
|                                                         | Has a doctor EVER told you that you have high blood pressure – when not pregnant                                                                                                             | Yes<br>__ Age when condition was first found                                                                                                            | 1. Yes<br>2. No |
| Takes blood pressure medication                         | Have you taken any medications, vitamins or supplements for most of the last 4 weeks, including HRT and the pill?                                                                            | Yes/No<br>If yes, was it:<br>Avapro, Karvea<br>Coversyl, Coversyl Plus<br>Cardizem, Vasocordol<br>Norvasc<br>Tritace<br>Noten, Tenormin <i>atenolol</i> | 1. Yes<br>2. No |
| Treated for high cholesterol in last month              | In the last month have you been treated for high blood cholesterol?                                                                                                                          | Yes<br>__ Age started treatment                                                                                                                         | 1. Yes<br>2. No |

**Supplementary Table 3.** Baseline Socio-demographic, health and behavioural characteristics by duration of diabetes missingness (n=25 713)

|                                                |                                          | Not Missing   | Missing      | Total         |
|------------------------------------------------|------------------------------------------|---------------|--------------|---------------|
|                                                |                                          | N=19 277      | N=6 436      |               |
| Age Group                                      | 45-59                                    | 5 150 (26.7)  | 1 278 (19.9) | 6 428 (25)    |
|                                                | 60-75                                    | 9 316 (48.3)  | 2 918 (45.3) | 12 234 (47.6) |
|                                                | 75+                                      | 4 811 (25)    | 2 240 (34.8) | 7 051 (27.4)  |
| Sex                                            | Male                                     | 11 258 (58.4) | 3 439 (53.4) | 14 697 (57.2) |
|                                                | Female                                   | 8 019 (41.6)  | 2 997 (46.6) | 11 016 (42.8) |
| Index of socio-economic disadvantage, quintile | 1st Quintile (most disadvantaged)        | 5 353 (27.8)  | 1 953 (30.3) | 7306 (28.4)   |
|                                                | 2nd Quintile                             | 4 547 (23.6)  | 1 427 (22.2) | 5974 (23.2)   |
|                                                | 3rd Quintile                             | 3 470 (18)    | 1 134 (17.6) | 4604 (17.9)   |
|                                                | 4th Quintile                             | 2 763 (14.3)  | 866 (13.5)   | 3629 (14.1)   |
|                                                | 5th Quintile                             | 2 693 (14)    | 925 (14.4)   | 3618 (14.1)   |
|                                                | Missing                                  | 451 (2.3)     | 131 (2)      | 582 (2.3)     |
| Household income per year                      | <30 000                                  | 8 663 (44.9)  | 2 638 (41)   | 11301 (44)    |
|                                                | 30 000-<70 000                           | 4 056 (21)    | 994 (15.4)   | 5050 (19.6)   |
|                                                | 70 000+                                  | 2 324 (12.1)  | 590 (9.2)    | 2914 (11.3)   |
|                                                | Missing                                  | 4 234 (22)    | 2 214 (34.4) | 6448 (25.1)   |
| Highest education                              | Up to School or Intermediate Certificate | 8 113 (42.1)  | 2 979 (46.3) | 11092 (43.1)  |
|                                                | Higher School to Diploma                 | 7 779 (40.4)  | 2 328 (36.2) | 10107 (39.3)  |
|                                                | Degree or higher                         | 2 978 (15.4)  | 840 (13.1)   | 3818 (14.8)   |

|                                                    |                                      |               |              |               |
|----------------------------------------------------|--------------------------------------|---------------|--------------|---------------|
|                                                    | Missing                              | 407 (2.1)     | 289 (4.5)    | 696 (2.7)     |
| Language other than English spoken at home         | No                                   | 16 851 (87.4) | 5 389 (83.7) | 22 240 (86.5) |
|                                                    | Yes                                  | 2 426 (12.6)  | 1 047 (16.3) | 3 473 (13.5)  |
|                                                    | Missing                              |               |              |               |
| Country of Birth                                   | Australia                            | 13 891 (72.1) | 4 435 (68.9) | 18 326 (71.3) |
|                                                    | Asia/MidEast/SouthEurope/NorthAfrica | 1 605 (8.3)   | 660 (10.3)   | 2 265 (8.8)   |
|                                                    | Other                                | 3 619 (18.8)  | 1 226 (19)   | 4 845 (18.8)  |
|                                                    | Missing                              | 162 (0.8)     | 115 (1.8)    | 277 (1.1)     |
| Private health insurance                           | No                                   | 8 231 (42.7)  | 2 863 (44.5) | 11 094 (43.1) |
|                                                    | Yes                                  | 10 568 (54.8) | 3 319 (51.6) | 13 887 (54)   |
|                                                    | Missing                              | 478 (2.5)     | 254 (3.9)    | 732 (2.8)     |
| Body weight (BMI, kg/m²)                           | Underweight/Normal                   | 3 544 (18.4)  | 1 373 (21.3) | 4 917 (19.1)  |
|                                                    | Overweight                           | 6 589 (34.2)  | 2 160 (33.6) | 8 749 (34)    |
|                                                    | Obese                                | 7 851 (40.7)  | 2 222 (34.5) | 10 073 (39.2) |
|                                                    | Missing                              | 1 293 (6.7)   | 681 (10.6)   | 1 974 (7.7)   |
| Family hx of diabetes                              | No                                   | 10 235 (53.1) | 4 055 (63)   | 14 290 (55.6) |
|                                                    | Yes                                  | 9 042 (46.9)  | 2 381 (37)   | 11 423 (44.4) |
| Ever told by a doctor you have high blood pressure | No                                   | 7 243 (37.6)  | 3 127 (48.6) | 10 370 (40.3) |
|                                                    | Yes                                  | 12 034 (62.4) | 3 309 (51.4) | 15 343 (59.7) |
| Takes blood pressure medication                    | No                                   | 9 277 (48.1)  | 3 344 (52)   | 12 621 (49.1) |
|                                                    | Yes                                  | 10 000 (51.9) | 3 092 (48)   | 13 092 (50.9) |
|                                                    | No                                   | 12 860 (66.7) | 4 834 (75.1) | 17 694 (68.8) |



|                                              |     |               |              |               |
|----------------------------------------------|-----|---------------|--------------|---------------|
| Treated for high cholesterol in last month   | Yes | 6 417 (33.3)  | 1 602 (24.9) | 8 019 (31.2)  |
| Ever told by a doctor you have heart disease | No  | 14 624 (75.9) | 4 915 (76.4) | 19 539 (76)   |
|                                              | Yes | 4 653 (24.1)  | 1 521 (23.6) | 6 174 (24)    |
| Ever told by a doctor you have had a stroke  | No  | 17 983 (93.3) | 5 902 (91.7) | 23 885 (92.9) |
|                                              | Yes | 1 294 (6.7)   | 534 (8.3)    | 1 828 (7.1)   |

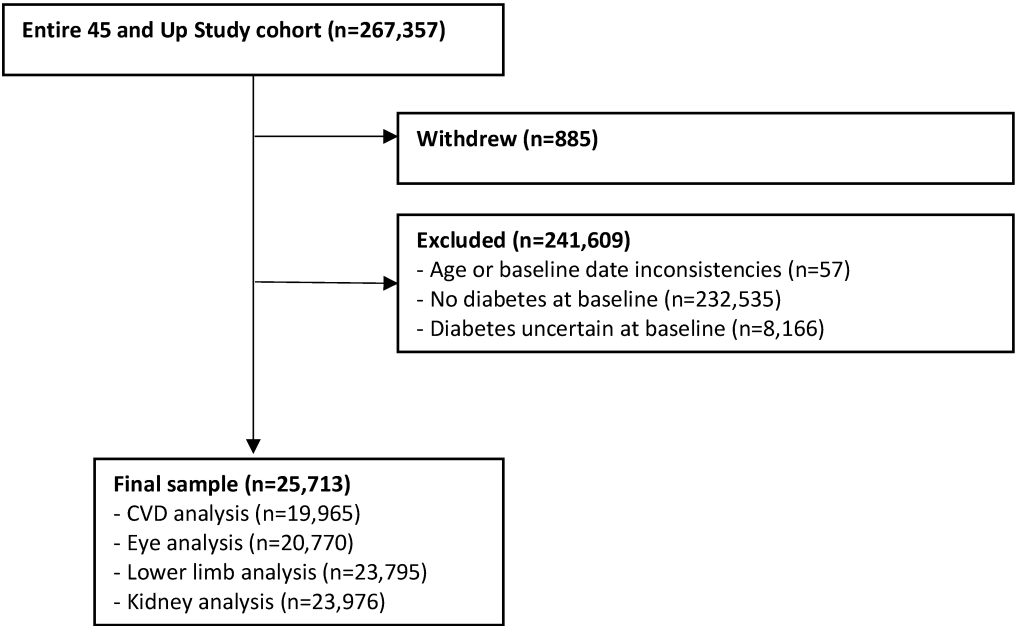

Supplementary Figure 1. Participant selection flow diagram

DVA, Department of Veteran Affairs.

**Supplementary Figure 2.** Adjusted hazards ratio (aHR) (95% CI) for association between sex and incident CVD complication subgroups, and age-adjusted incidence rates per 1000 person-years.

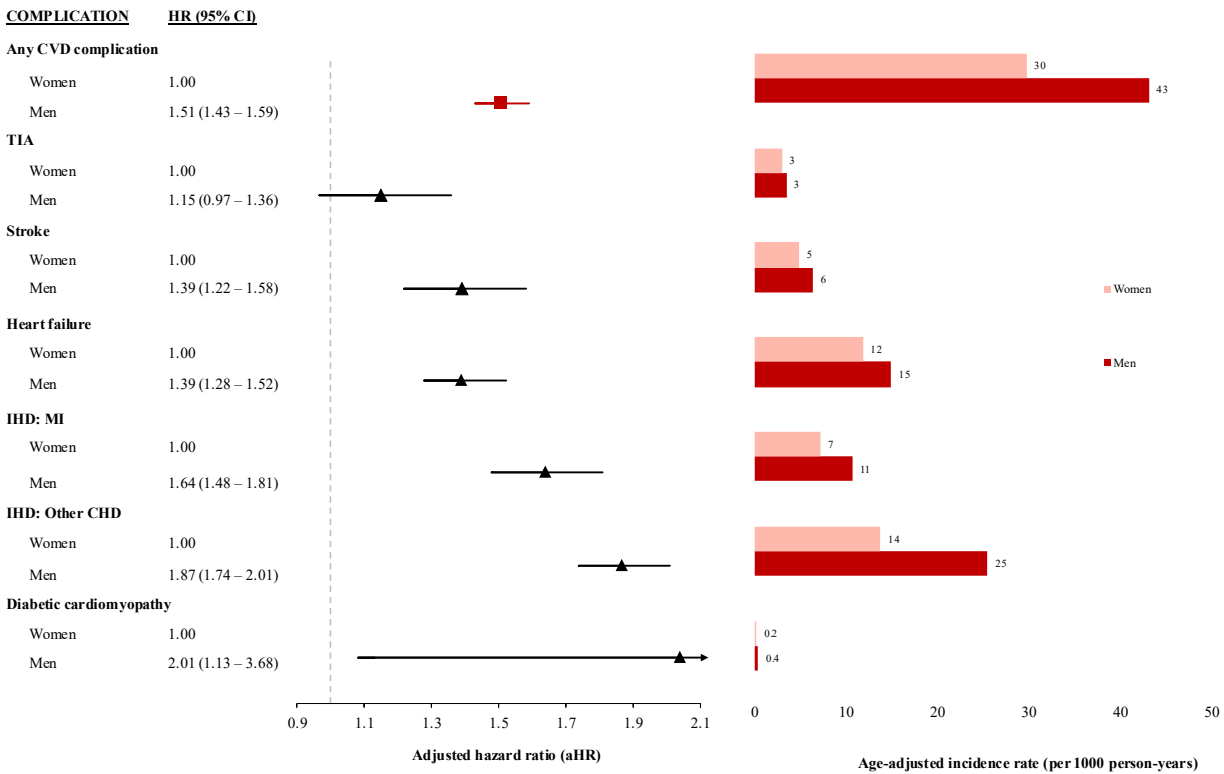

Hazards ratios are calculated from Cox proportional hazard models based on multiple imputed data adjusted for age, socio-demographics (education, SEIFA, income, language, country of birth, private insurance), lifestyle (BMI, smoking, diet and physical activity) and health history (family history of diabetes, cardiovascular disease, blood pressure and treatment for high cholesterol).

Supplementary Figure 3. A) Adjusted hazards ratio (aHR) (95% CI) for association between sex and incident eye complication subgroups, and B) age-adjusted incidence rates per 1000 person-years.

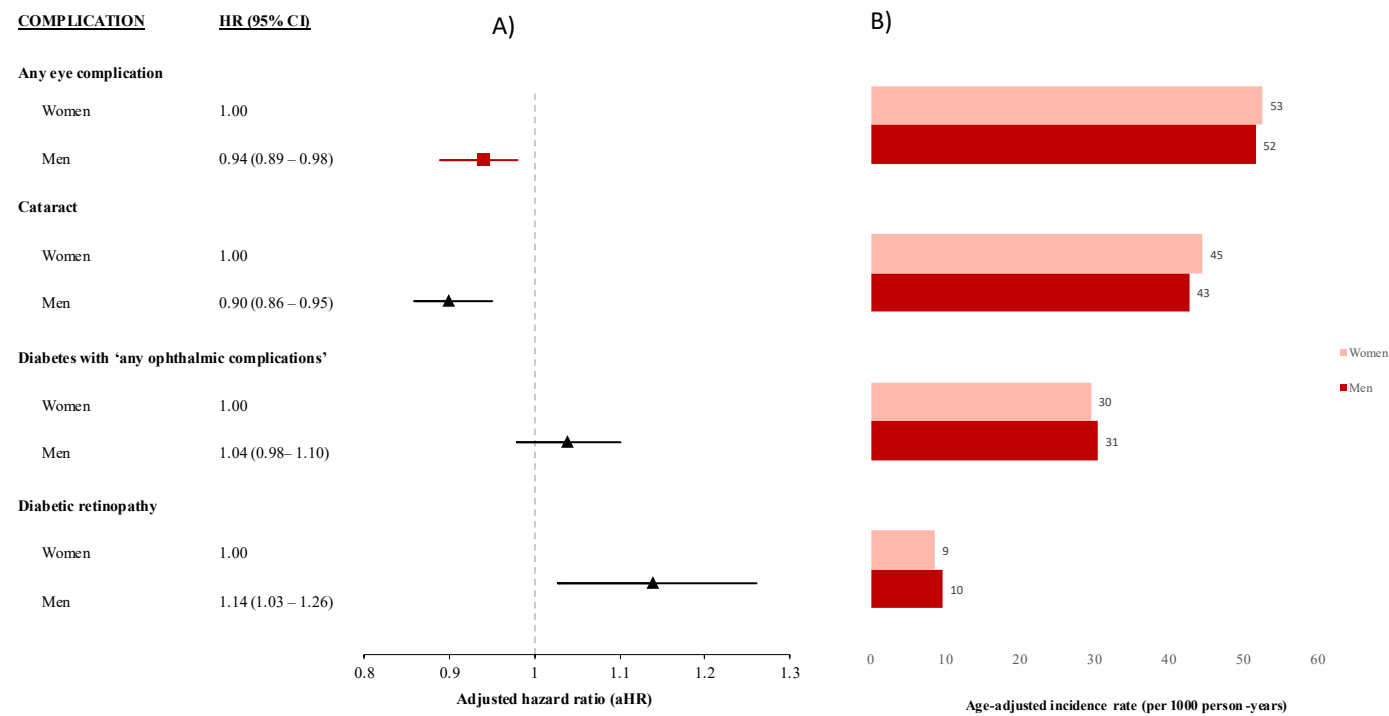

Hazards ratios are calculated from Cox proportional hazard models based on multiple imputed data adjusted for age, socio-demographics (education, SEIFA, income, language, country of birth, private insurance), lifestyle (BMI, smoking, diet and physical activity) and health history (family history of diabetes, cardiovascular disease, blood pressure and treatment for high cholesterol).

Supplementary Figure 4. A) Adjusted hazards ratio (aHR) (95% CI) for association between sex and incident lower limb complication subgroups, and B) age-adjusted incidence rates per 1000 person-years.

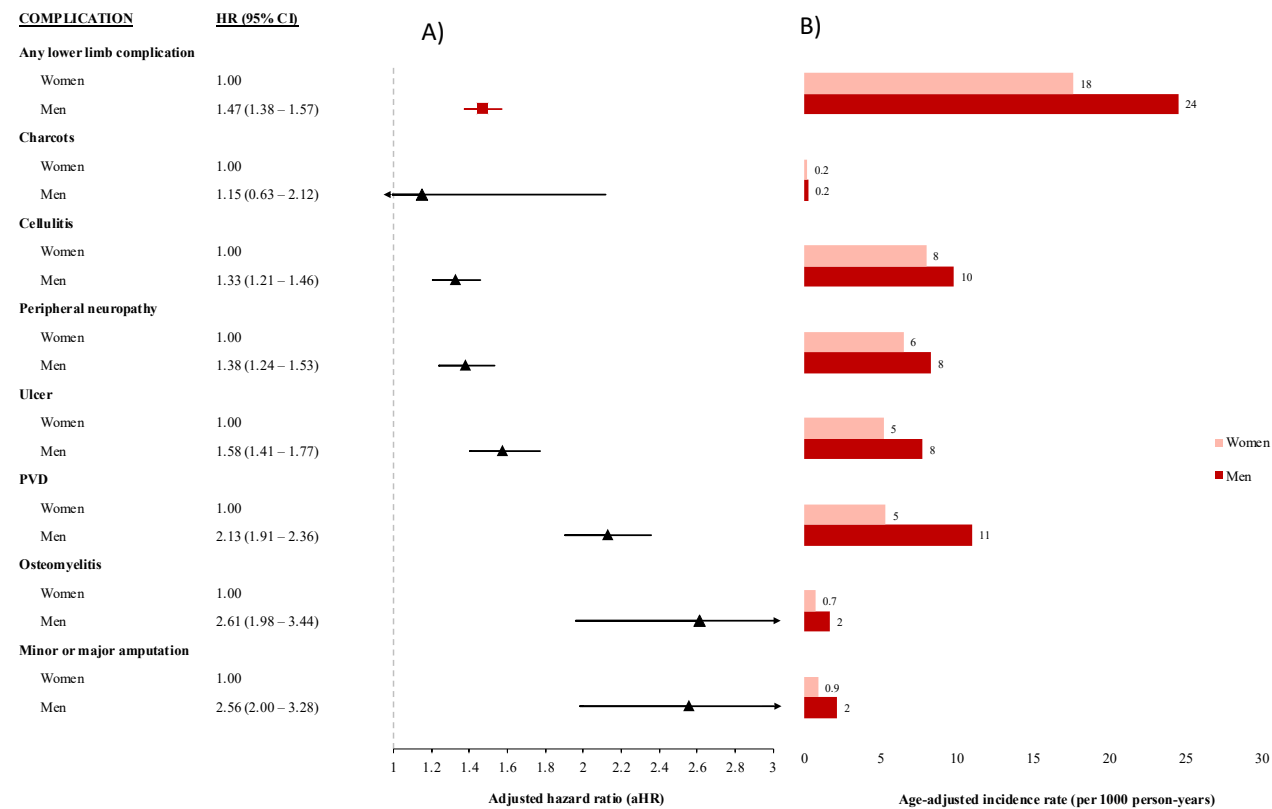

Hazards ratios are calculated from Cox proportional hazard models based on multiple imputed data adjusted for age, socio-demographics (education, SEIFA, income, language, country of birth, private insurance), lifestyle (BMI, smoking, diet and physical activity) and health history (family history of diabetes, cardiovascular disease, blood pressure and treatment for high cholesterol).

Supplementary Figure 5. A) Adjusted hazards ratio (aHR) (95% CI) for association between sex and incident kidney complication subgroups, and B) age-adjusted incidence rates per 1000 person-years.

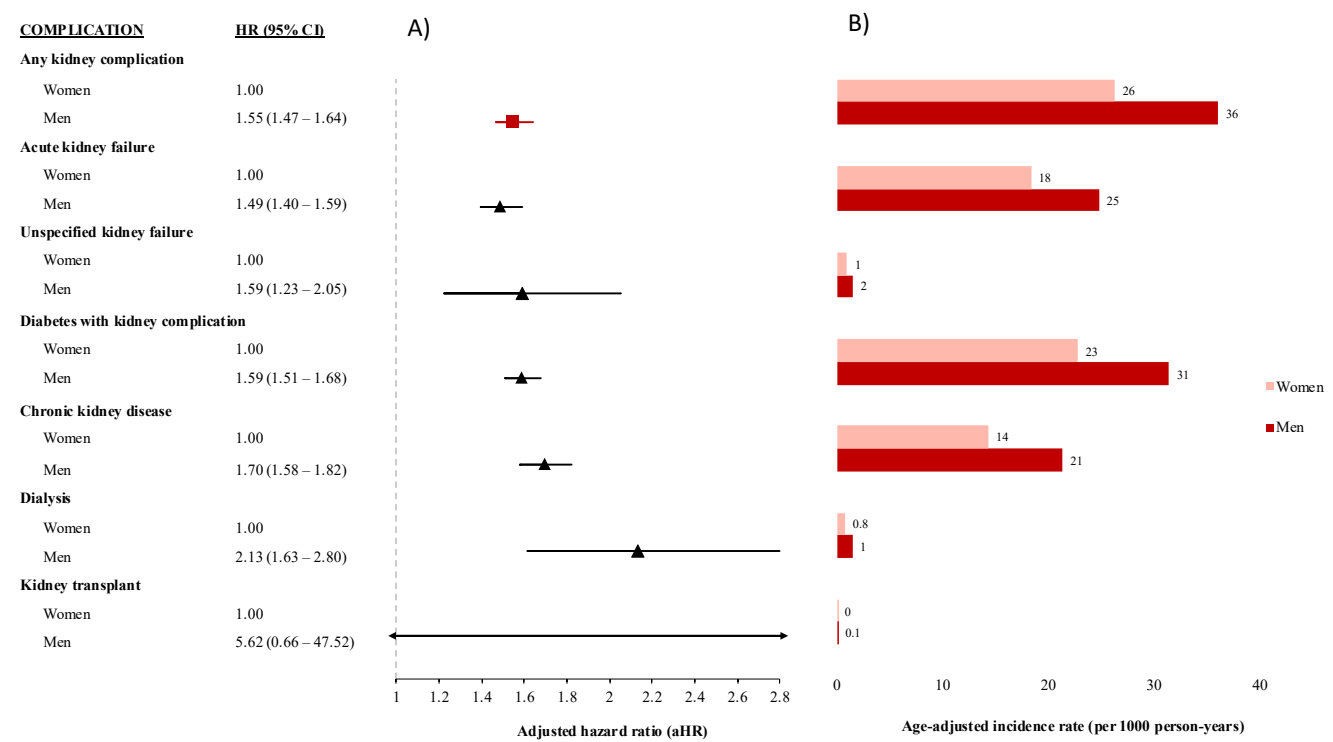

Hazards ratios are calculated from Cox proportional hazard models based on multiple imputed data adjusted for age, socio-demographics (education, SEIFA, income, language, country of birth, private insurance), lifestyle (BMI, smoking, diet and physical activity) and health history (family history of diabetes, cardiovascular disease, blood pressure and treatment for high cholesterol).

**Supplementary Figure 6.** Hazard function survival curves by sex and duration of diabetes at baseline for each complication group; A) CVD complications, B) eye complications, C) lower limb complications, and D) kidney complications. P-values in the figures represents the results for the log-rank test.

### A) CVD

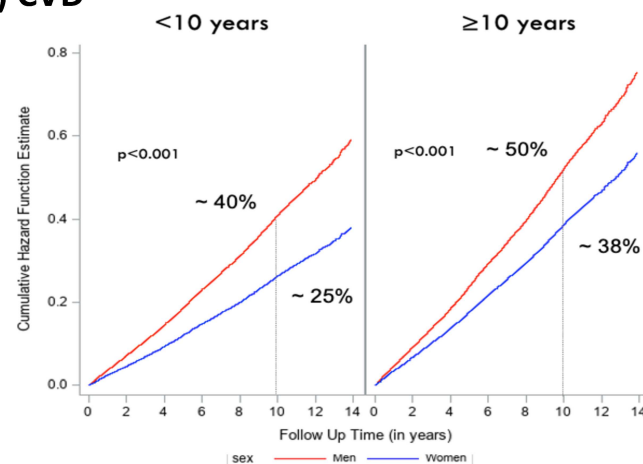

### B) Eye

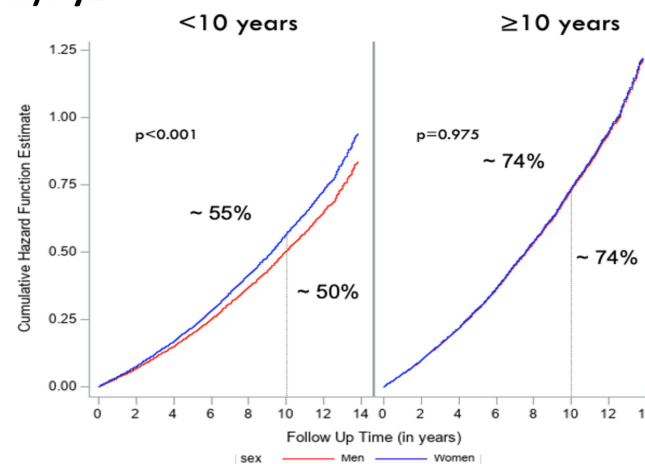

### C) Lower limb

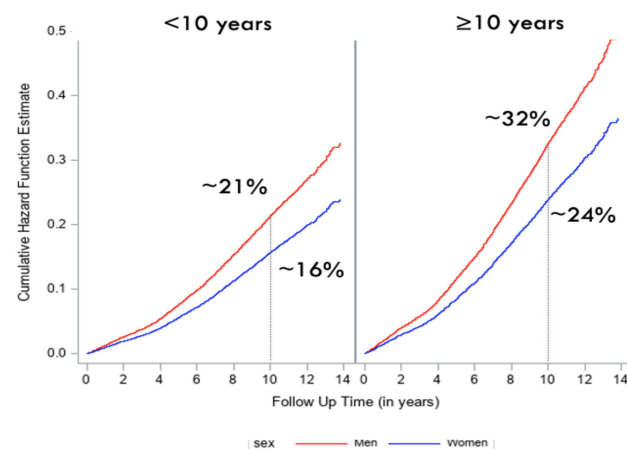

### D) Kidney

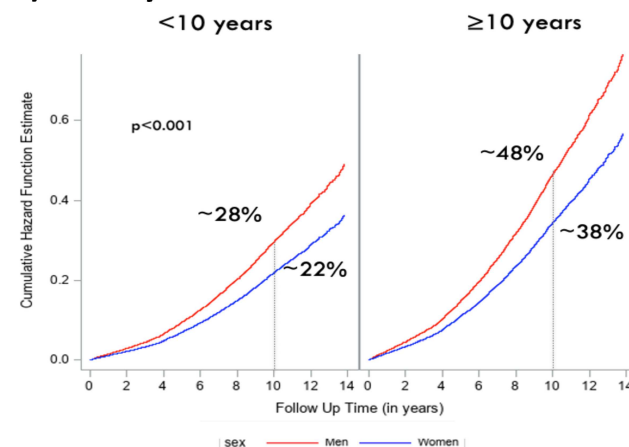

**Supplementary Table 4.** Results from cox proportional hazards model exploring the relationship between sex and incident diabetes-related complications by group and subgroup, stratified by duration of diabetes: (Imputed data, fully adjusted model<sup>1</sup>).

|                                              | Male vs Female       |                     |                                             |                    |                                                               |                    |
|----------------------------------------------|----------------------|---------------------|---------------------------------------------|--------------------|---------------------------------------------------------------|--------------------|
|                                              | Imputed              |                     |                                             |                    |                                                               |                    |
| Duration of Diabetes                         | Missing<br>(n=6 436) |                     | Less than 10 years s baseline<br>(n=11 211) |                    | Greater than or equal to 10 years at<br>baseline<br>(n=8 066) |                    |
|                                              | Unadjusted           | Adjusted            | Unadjusted                                  | Adjusted           | Unadjusted                                                    | Adjusted           |
| <b>CVD complications</b>                     | 1.31 (1.19 - 1.45)   | 1.39 (1.25 - 1.54)  | 1.55 (1.43 - 1.67)                          | 1.67 (1.53 - 1.82) | 1.42 (1.31 - 1.55)                                            | 1.37 (1.25 - 1.50) |
| Diabetic cardiomyopathy                      | 5.21 (1.14 - 23.78)  | 4.95 (0.98 - 25.0)  | 2.48 (0.89 - 6.90)                          | 3.10 (1.04 - 9.23) | 1.28 (0.60 - 2.7)                                             | 1.17 (0.52 - 2.61) |
| IHD:MI                                       | 1.43 (1.19 - 1.73)   | 1.60 (1.31 - 1.95)  | 1.60 (1.37 - 1.88)                          | 1.78 (1.50 - 2.11) | 1.40 (1.20 - 1.64)                                            | 1.46 (1.24 - 1.73) |
| IHD: Other CHD                               | 1.87 (1.62 - 2.16)   | 1.96 (1.68 - 2.28)  | 1.99 (1.79 - 2.22)                          | 2.08 (1.86 - 2.33) | 1.61 (1.44 - 1.81)                                            | 1.53 (1.35 - 1.73) |
| TIA                                          | 0.96 (0.71 - 1.30)   | 0.98 (0.71 - 1.37)  | 1.28 (0.99 - 1.64)                          | 1.31 (1.00 - 1.73) | 1.20 (0.92 - 1.56)                                            | 1.12 (0.84 - 1.49) |
| Stroke                                       | 1.03 (0.82 - 1.29)   | 1.17 (0.91 - 1.49)  | 1.47 (1.22 - 1.78)                          | 1.58 (1.28 - 1.95) | 1.41 (1.15 - 1.73)                                            | 1.34 (1.07 - 1.67) |
| Heart Failure                                | 1.20 (1.03 - 1.39)   | 1.29 (1.10 - 1.51)  | 1.23 (1.08 - 1.40)                          | 1.49 (1.30 - 1.72) | 1.34 (1.18 - 1.52)                                            | 1.33 (1.16 - 1.53) |
|                                              |                      |                     |                                             |                    |                                                               |                    |
| <b>Eye complications</b>                     | 0.96 (0.88 - 1.05)   | 0.9 (0.82 - 0.99)   | 0.93 (0.87 - 0.99)                          | 0.87 (0.81 - 0.94) | 1.06 (0.99 - 1.14)                                            | 1.00 (0.93 - 1.09) |
| Diabetes ‘with any ophthalmic complications’ | 1.06 (0.94 - 1.19)   | 1.09 (0.96 - 1.24)  | 0.97 (0.89 - 1.05)                          | 0.94 (0.86 - 1.03) | 1.08 (0.98 - 1.17)                                            | 1.04 (0.94 - 1.14) |
| Cataract                                     | 0.97 (0.88 - 1.06)   | 0.90 (0.81 - 0.99)  | 0.89 (0.83 - 0.95)                          | 0.83 (0.77 - 0.89) | 1.06 (0.98 - 1.15)                                            | 0.99 (0.90 - 1.08) |
| Diabetic retinopathy                         | 1.04 (0.85 - 1.27)   | 1.01 (0.81 - 1.26)  | 1.16 (1.00 - 1.34)                          | 1.12 (0.95 - 1.31) | 1.09 (0.94 - 1.26)                                            | 1.16 (0.99 - 1.36) |
|                                              |                      |                     |                                             |                    |                                                               |                    |
| <b>Lower limb complications</b>              | 1.36 (1.20 - 1.53)   | 1.41 (1.24 - 1.61)  | 1.46 (1.33 - 1.60)                          | 1.55 (1.40 - 1.71) | 1.33 (1.21 - 1.46)                                            | 1.36 (1.23 - 1.51) |
| Peripheral neuropathy                        | 1.22 (0.97 - 1.53)   | 1.36 (1.07 - 1.74)  | 1.34 (1.15 - 1.56)                          | 1.44 (1.22 - 1.70) | 1.23 (1.07 - 1.43)                                            | 1.23 (1.05 - 1.44) |
| Ulcer                                        | 1.49 (1.20 - 1.84)   | 1.57 (1.25 - 1.98)  | 1.54 (1.29 - 1.84)                          | 1.68 (1.38 - 2.04) | 1.44 (1.22 - 1.69)                                            | 1.38 (1.16 - 1.65) |
| Cellulitis (toe, foot or lower limb)         | 1.28 (1.08 - 1.52)   | 1.36 (1.13 - 1.64)  | 1.28 (1.11 - 1.47)                          | 1.43 (1.22 - 1.67) | 1.14 (0.99 - 1.32)                                            | 1.17 (1.00 - 1.37) |
| Charcot toe                                  | 1.88 (0.34 - 10.3)   | 1.70 (0.26 - 11.25) | 1.41 (0.55 - 3.58)                          | 1.14 (0.42 - 3.07) | 0.91 (0.42 - 2.01)                                            | 0.88 (0.37 - 2.10) |
| Osteomyelitis                                | 2.57 (1.36 - 4.85)   | 2.72 (1.38 - 5.34)  | 2.00 (1.29 - 3.11)                          | 2.40 (1.50 - 3.85) | 2.45 (1.68 - 3.57)                                            | 2.48 (1.66 - 3.71) |



|                                   |                    |                    |                    |                    |                    |                    |
|-----------------------------------|--------------------|--------------------|--------------------|--------------------|--------------------|--------------------|
| Peripheral vascular disease       | 2.20 (1.79 - 2.72) | 2.22 (1.77 - 2.78) | 2.32 (1.97 - 2.74) | 2.41 (2.02 - 2.87) | 1.75 (1.50 - 2.03) | 1.75 (1.49 - 2.06) |
| Minor or major amputation         | 2.30 (1.41 - 3.73) | 2.44 (1.46 - 4.06) | 2.36 (1.58 - 3.53) | 2.50 (1.63 - 3.85) | 2.52 (1.76 - 3.59) | 2.5 (1.71 - 3.64)  |
|                                   |                    |                    |                    |                    |                    |                    |
| <b>Kidney complications</b>       | 1.40 (1.27 - 1.54) | 1.58 (1.42 - 1.75) | 1.36 (1.26 - 1.47) | 1.57 (1.44 - 1.71) | 1.37 (1.27 - 1.48) | 1.43 (1.31 - 1.56) |
| Diabetes with kidney complication | 1.39 (1.24 - 1.56) | 1.64 (1.46 - 1.85) | 1.37 (1.26 - 1.49) | 1.59 (1.45 - 1.74) | 1.37 (1.26 - 1.49) | 1.44 (1.32 - 1.57) |
| Acute kidney failure              | 1.33 (1.18 - 1.48) | 1.47 (1.30 - 1.67) | 1.41 (1.28 - 1.55) | 1.61 (1.45 - 1.78) | 1.32 (1.20 - 1.45) | 1.32 (1.19 - 1.46) |
| Chronic kidney disease            | 1.49 (1.31 - 1.70) | 1.70 (1.48 - 1.95) | 1.48 (1.33 - 1.64) | 1.71 (1.52 - 1.92) | 1.46 (1.32 - 1.62) | 1.57 (1.41 - 1.75) |
| Unspecified kidney failure        | 1.75 (1.11 - 2.74) | 1.82 (1.12 - 2.97) | 1.72 (1.15 - 2.59) | 1.76 (1.13 - 2.74) | 1.26 (0.87 - 1.83) | 1.28 (0.85 - 1.92) |
| Dialysis                          | 2.20 (1.33 - 3.62) | 2.46 (1.45 - 4.16) | 1.80 (1.16 - 2.79) | 1.97 (1.23 - 3.15) | 1.76 (1.18 - 2.64) | 1.99 (1.30 - 3.05) |
| Transplantation                   | 1.91 (0.17 - 21.1) | 1.61 (0.08 – 31.0) | -                  | -                  | -                  | -                  |

<sup>1</sup>Model adjusted for age, SEIFA, household income, education, language at home, country of birth, private health insurance, BMI category, smoking status, physical activity, fruit and vegetable consumption, family history of diabetes, ever diagnosed with; heart disease, high blood pressure or stroke, blood pressure or cholesterol medication use.

Supplementary Table 5. Rates of CVD complications (hospitalisations or death) among the study cohort.

| Sex               | Case                            | Frequency | Percent |
|-------------------|---------------------------------|-----------|---------|
| All (n=25 713)    | No CVD hospitalisation or death | 13 187    | 51.3    |
|                   | CVD hospitalisation only        | 10 627    | 41.3    |
|                   | CVD death after hospitalisation | 1 640     | 6.4     |
|                   | CVD death first                 | 259       | 1.0     |
| Males (n=14 697)  | No CVD hospitalisation or death | 6 695     | 45.6    |
|                   | CVD hospitalisation only        | 6 734     | 45.8    |
|                   | CVD death after hospitalisation | 1 105     | 7.5     |
|                   | CVD death first                 | 163       | 1.1     |
| Female (n=11 016) | No CVD hospitalisation or death | 6 492     | 58.9    |
|                   | CVD hospitalisation only        | 3 893     | 35.3    |
|                   | CVD death after hospitalisation | 535       | 5.9     |
|                   | CVD death first                 | 96        | 0.9     |
